# Supplementary material for: Establishing content validity for a conceptualized instrument to measure barriers to eating a healthful diet in adults: a consensus approach
Source: BMC Health Serv Res. 2020 Jan 16;20:41. doi: 10.1186/s12913-020-4890-7 (PMC6966857; doi:10.1186/s12913-020-4890-7)
Supplement: Supplementary file 2 — Additional file 2: Task spreadsheet with list of identified items assigned to TDF domains. Excel spreadsheet containing the task performed by expert reviewers. [file 12913_2020_4890_MOESM2_ESM.xlsx]

## Sheet: Task sheet
TDF theoretical domain	TDF domain description	TDF Theoretical construct	Study's researchers adapted domain description	NHANES variable item	NHANES variable description	NHANES variable item question	Yes/No selection option	Domain re-assignment
Knowledge	An awareness of the existence of something	Knowledge (including knowledge of condition /scientific rationale) Procedural knowledge Knowledge of task environment	An awareness of the dietary guidelines, their general health and health risks factors and the benefits of sports and recreational activities	CBQ595	Heard of MyPyramid	Next I’m going to ask a few questions about the nutritional guidelines recommended for Americans by the federal government. {Have you} heard of My Pyramid?
				CBQ600	Heard of Food Pyramid	{Have you} heard of the Food Pyramid or the Food Guide Pyramid?
				MCQ080	Doctor ever said you were overweight	Has a doctor or other health professional ever told {you} that {you were} overweight?
Skills	An ability or proficiency acquired through practice	Skills Skills development Competence Ability Interpersonal skills Practice Skill assessment	The competence or capacity that help a person routinely manage their diet and health in a productive manner; making appropriate dietary choices, staying healthy, and engaging in sports and recreational activities	PAQ650	Vigorous recreational activities	{Do you} do any vigorous-intensity sports, fitness, or recreational activities that cause large increases in breathing or heart rate like running or basketball for at least 10 minutes continuously?
				PAQ665	Moderate recreational activities	Do you} do any moderate-intensity sports, fitness, or recreational activities that cause a small increase in breathing or heart rate such as brisk walking, bicycling, swimming, or golf for at least 10 minutes continuously?
				DRQSDIET	On special diet?	Are you currently on any kind of diet, either to lose weight or for some other health-related reason? (if Yes, which diet)
				BPQ056	Take blood pressure at home last 12 mos?	{Did you} take {your} blood pressure at home during the last 12 months?
Social/professional role and identity	A coherent set of behaviors and displayed personal qualities of an individual in a social or work setting	Professional identity Professional role Social identity Identity Professional boundaries Professional confidence Group identity Leadership Organizational commitment	A person sense of self/identity in view of a health characteristic that he/she may have to identify with or has identified with [i.e. psychological ownership related to illness and disease state (Farrell et al. 2004); learning to live with a chronic illness involves a process of shifts in identity as the individual grapples with the changes in the sense of self that existed prior to the illness (…	BPQ020	Ever told you had high blood pressure	{Have you} ever been told by a doctor or other health professional that {you} had hypertension, also called high blood pressure?
				BPQ030	Told had high blood pressure 2+ times	{Were you} told on 2 or more different visits that {you} had hypertension, also called high blood pressure?
				BPQ057	Borderline Hypertension	{Have you} ever been told by a doctor or other health professional that {you have} high normal blood pressure, prehypertension or borderline hypertension?
				BPQ080	Doctor told you - high cholesterol level	{Have you} ever been told by a doctor or other health professional that {your} blood cholesterol level was high?
				DIQ010	Doctor told you have diabetes	The next questions are about specific medical conditions {Have you} ever been told by a doctor or health professional that {you have} diabetes or sugar diabetes?
				DIQ160	Ever told you have prediabetes	{Have you} ever been told by a doctor or other health professional that {you have} any of the following: prediabetes, impaired fasting glucose, impaired glucose tolerance, borderline diabetes or that {your} blood sugar is higher than normal but not high enough to be called diabetes or sugar diabetes?
				DIQ170	Ever told have health risk for diabetes	{Have you} ever been told by a doctor or other health professional that {you have} health conditions or a medical or family history that increases {your} risk for diabetes?
				MCQ160b	Ever told had congestive heart failure	Has a doctor or other health professional ever told {you} that {you} . . .had congestive heart failure?
				MCQ160c	Ever told you had coronary heart disease	Has a doctor or other health professional ever told {you} that {you} . . .had coronary (kor-o-nare-ee) heart disease?
				MCQ160d	Ever told you had angina/angina pectoris	Has a doctor or other health professional ever told {you} that {you} . . .had angina (an-gi-na), also called angina pectoris?
				MCQ160e	Ever told you had heart attack	Has a doctor or other health professional ever told {you} that {you} . . .had a heart attack (also called myocardial infarction (my-o-car-dee-al in-fark-shun))?
				MCQ160f	Ever told you had a stroke	Has a doctor or other health professional ever told {you} that {you} . . .had a stroke?
Beliefs about capabilities	Acceptance of the truth, reality, or validity about an ability, talent, or facility that a person can put to constructive use	Self-confidence Perceived competence Self-efficacy Perceived behavioral control Beliefs Self-esteem Empowerment Professional confidence	A person’s belief concerning their confidence, control, or performance concerning making appropriate dietary choices, staying healthy and engaging in sports and recreational activities	No variables items found that could represent this domain	X	X
Optimism	The confidence that things will happen for the best, or that desired goals will be attained	Optimism Pessimism Unrealistic optimism Identity	A person’s confidence that things will happen for the best; never give up hope or look at the bright side of life [Studies have found an inverse correlation between optimism and depressive symptoms; and people with disabilities face unique challenges and stresses which place them at increased risk for depression (Rasmussen et al., 2009 and Maruta et al., 2002)]	DPQ010	Have little interest in doing things	Over the last 2 weeks, how often have you been bothered by the following problems: little interest or pleasure in doing things?
				DPQ020	Feeling down, depressed, or hopeless	Over the last 2 weeks, how often have you been bothered by the following problems: feeling down, depressed, or hopeless?
				DPQ090	Thought you would be better off dead	Over the last 2 weeks, how often have you been bothered by the following problems: Thoughts that you would be better off dead or of hurting yourself in some way?
				PFQ054	Need special equipment to walk	Because of a health problem, {do you} have difficulty walking without using any special equipment?
				PFQ057	Experience confusion/memory problems	{Are you} limited in any way because of difficulty remembering or because {you} experience{s} periods of confusion?
				PFQ059	Physical, mental, emotional limitations	{Are you} limited in any way in any activity because of a physical, mental or emotional problem?
				PFQ061B	Walking for a quarter mile difficulty	By {yourself} and without using any special equipment, how much difficulty {do you} have . . .walking for a quarter of a mile [that is about 2 or 3 blocks]?
				PFQ061G	Preparing meals difficulty	By {yourself} and without using any special equipment, how much difficulty {do you/does SP} have . . .preparing {your} own meals?
				HSQ470	no. of days physical health was not good	The next questions are about {your} recent health during the 30 days outlined on the calendar. Thinking about {your} physical health, which includes physical illness and injury, for how many days during the past 30 days was {your} physical health not good?
				HSQ493	Pain make it hard for usual activities	During the past 30 days, for about how many days did pain make it hard for {you} to do {your} usual activities, such as self-care, work, or recreation?
Beliefs about consequences	Acceptance of the truth, reality, or validity about outcomes of a behavior in a given situation	Beliefs Outcome expectancies Characteristics of outcome expectancies Anticipated regret Consequents	A person’s subjective rating of his/her general health, diet, and weight and his/her belief about the outcomes of making appropriate dietary choices, staying healthy and engaging in sports and recreational activities	DIQ172	Feel could be at risk for diabetes	{Do you} feel {you} could be at risk for diabetes or prediabetes?
				HUQ010	General health condition	{First} I have some general questions about {your} health. Would you say {your} health in general is excellent, very good, good, fair, or poor?
				WHQ030	How do you consider your weight	{Do you} consider {your} self now to be; overweight, underweight or about the right weight?
				DBQ700	How healthy is the diet	Next I have some questions about {your} eating habits. In general, how healthy is {your} overall diet; excellent, very good, good, fair, or poor?
				DIQ172	Feel could be at risk for diabetes	{Do you} feel {you} could be at risk for diabetes or prediabetes?
Reinforcement	Increasing the probability of a response by arranging a dependent relationship, or contingency, between the response and a given stimulus	Rewards (proximal / distal, valued / not valued, probable / improbable) Incentives Punishment Consequents Reinforcement Contingencies Sanctions	Internal or external responses to a person's behavior that affect the likelihood of making appropriate dietary choices, staying healthy and engaging in sports, fitness and recreational activities [Social Cognitive Theory (SCT)]	MCQ365a	Doctor told you to lose weight	To lower {your} risk for certain diseases, during the past 12 months {have you} ever been told by a doctor or health professional to: control {your} weight or lose weight?
				MCQ365b	Doctor told you to exercise	To: increase {your} physical activity or exercise?
				MCQ365c	Doctor told you to reduce salt in diet	To: reduce the amount of sodium or salt in {your} diet?
				MCQ365d	Doctor told you to reduce fat/calories	To: reduce the amount of fat or calories in {your} diet?
				BPQ040A	Taking prescription for hypertension	Because of {your} (high blood pressure/hypertension), {have you} ever been told to . . . take prescribed medicine?
				BPQ059	Doctor tell you to take BP at home?	Did a doctor or other health professional tell {you} to take {your} blood pressure at home?
				BPQ090	Told to take prescription for cholesterol	[To lower (your) blood cholesterol, (have) (you) ever been told by a doctor or other health professional]... to take prescribed medicine?
Intentions	A conscious decision to perform a behavior or a resolve to act in a certain way	Stability of intentions Stages of change model Trans theoretical model and stages of change	Readiness/commitment to make healthy dietary choices, stay healthy and engage in sports and recreational activities	WHD045	How much would like to weigh (pounds)	How much {would you} like to weigh?
Goals	Mental representation of outcomes or end states that an individual wants to achieve	Goals (distal / proximal) Goal priority Goal / target setting Goals (autonomous / controlled) Action planning Implementation intention	An aim or an objective a person wants to achieve concerning their diet and health	WHQ040	Like to weigh more, less or same	Would {you} like to weigh more, less or same?
Memory, attention and decision processes	The ability to retain information, focus selectively on aspects of the environment, and choose between two or more alternatives	Memory Attention Attention control Decision making Cognitive overload / tiredness	The ability to retain information concerning diet and health and to be able to focus on making appropriate dietary and health choices	DPQ040	Feeling tired or having little energy	[Over the last 2 weeks, how often have you been bothered by the following problems: feeling tired or having little energy?
				DPQ070	Trouble concentrating on things	[Over the last 2 weeks, how often have you been bothered by the following problems:] trouble concentrating on things, such as reading the newspaper or watching TV?
				DUQ215Q	Time since last used marijuana regularly	How long has it been since you last smoked marijuana or hashish at least once a month for one year? INSTRUCTIONS TO SP: Please enter the number of days, weeks, months, or years, then select the unit of time. Have you ever, even once, used marijuana or hashish?
				DUQ215U	Time since used marijuana regularly/unit	How long has it been since you last smoked marijuana or hashish at least once a month for one year? INSTRUCTIONS TO SP: Please enter the number of days, weeks, months, or years, then select the unit of time. Have you ever, even once, used marijuana or hashish?
				DUQ270Q	Last time you used cocaine, in any form	How long has it been since you last used cocaine, in any form? INSTRUCTIONS TO SP: Please enter the number of days, weeks, months, or years, then select unit of time. Have you ever, even once, used cocaine, in any form?
				DUQ270U	Last time you used cocaine/unit	How long has it been since you last used cocaine, in any form? INSTRUCTIONS TO SP: Please enter the number of days, weeks, months, or years, then select unit of time. Have you ever, even once, used cocaine, in any form?
				DUQ310Q	Last time used heroin	How long has it been since you last used heroin? INSTRUCTIONS TO SP: Please enter the number of days, weeks, months, or years, then select the unit of time.
				DUQ310U	Last time used heroin/unit	How long has it been since you last used heroin? INSTRUCTIONS TO SP: Please enter the number of days, weeks, months, or years, then select the unit of time.
				DUQ350Q	Last time used methamphetamine	How long has it been since you last used methamphetamine? INSTRUCTIONS TO SP: Please enter the number of days, weeks, months, or years, then select the unit of time.
				DUQ350U	Last time used methamphetamine/unit	How long has it been since you last used methamphetamine? INSTRUCTIONS TO SP: Please enter the number of days, weeks, months, or years, then select the unit of time
				ALQ120Q	How often drink alcohol over past 12 mos	In {your} entire life, {have you} had at least 12 drinks of any type of alcoholic beverage?
				ALQ120U	# days drink alcohol per wk, mo, yr	In any one year, {have you} had at least 12 drinks of any type of alcoholic beverage? By a drink, I mean a 12 oz. beer, a 5 oz. glass of wine, or one and a half ounces of liquor.
				ALQ130	Avg # alcoholic drinks/day - past 12 mos	In the past 12 months, on those days that {you} drank alcoholic beverages, on the average, how many drinks did {you} have? (By a drink, I mean a 12 oz. beer, a 5 oz. glass of wine, or one and a half ounces of liquor.)
Environmental context and resources	Any circumstance of a person’s situation or environment that discourages or encourages the development of skills and abilities, independence, social competence, and adaptive behavior	Environmental stressors Resources / material resources Organizational culture /climate Salient events / critical incidents Person x environment interaction Barriers and facilitators	Any characteristics of the socio-political context, organization, and the person that discourages or encourages a person to make appropriate dietary choices, stay healthy and engage in sports and recreational activities	INDFMPIR	Ratio of family income to poverty	What is the ratio of your family income to poverty?
				FSDHH	Household food security category	For the last 12 months, what has been your household food security status?
				FSQ171	HH Emergency food received	In the last 12 months, did {you/you or any member of your household} receive SNAP or Food Stamp benefits?
				FSD151	HH FS benefit	In the last 12 months, did (you/you or any member of your household) ever get emergency food from a church, a food pantry, or a food bank, or eat in a soup kitchen?
				OCD150	Type of work done last week	In this part of the survey I will ask you questions about {your} work experience. Which of the following {were you} doing last week.
				DMDEDUC2	Education level - Adults 20+	What is the highest grade or level of school {you have} completed or the highest degree {you have} received?
				SMD650	Avg # cigarettes/day during past 30 days	During the past 30 days, on the days that {you/SP} smoked, how many cigarettes did {you/s/he} smoke per day?
				PFQ049	Limitations keeping you from working	The next set of questions is about limitations caused by any long-term physical, mental or emotional problem or illness. Does a physical, mental or emotional problem now keep {you} from working at a job or business?
				PFQ051	Limited in amount of work you can do	{Are you} limited in the kind or amount of work {you} can do because of a physical, mental or emotional problem?
				PFQ061A	Managing money difficulty	Ask about difficulties {you} may have doing certain activities because of a health problem. any long-term physical, mental or emotional problem or illness. By {yourself} and without using any special equipment, how much difficulty {do you} have . . .managing {your} money [such as keeping track of {your} expenses or paying bills]?
				PFQ061R	Attending social event difficulty (social isolation/ interaction/independence)	By {yourself} and without using any special equipment, how much difficulty {do you/does SP} have . . . participating in social activities [visiting friends, attending clubs or meetings or going to parties]?
				CBD070	Money spent at supermarket/grocery store	The next questions are about how much money {your family spends/you spend} on food. During the past 30 days, how much money {did your family/did you} spend at supermarkets or grocery stores? Please include purchases made with food stamps.
				CBD110	Money spent on food at other stores	About how much money {did your family/did you} spend on food at these types of stores? (Please do not include any stores you have already told me about.)
				CBD120	Money spent on eating out	During the past 30 days, how much money {did your family/did you} spend on eating out? Please include money spent in cafeterias at work or at school or on vending machines, for all family members.
				CBD130	Money spent on carryout/delivered foods	During the past 30 days, how much money {did your family/did you} spend on food carried out or delivered? Please do not include money you have already told me about.
Social influences	Those interpersonal processes that can cause an individual to change their thoughts, feelings, or behaviors	Social pressure Social norms Group conformity Social comparisons Group norms Social support Power Intergroup conflict Alienation Group identity Modelling	A person’s association with people and situations in society that dictates the way he/she thinks about things that might affect his/her diet, health, and sports and recreational activity level	DMDBORN	Country of birth	In what country {were you} born? Born in 50 US states or Washington, DC
				DMDYRSUS	Length of time in US	Length of time the participant has been in the US.
				RIDRETH3	Race/Hispanic origin w/ NH Asian	Please look at the categories on this card. What race or races {do you} consider {yourself} to be? Please select one or more.
				RIAGENDR	Gender	Gender of the participant
				DMDMARTL	Marital status	{Are you} now married, widowed, divorced, separated, never married or living with a partner?
				DMDCITZN	Citizenship status	{Are you} a citizen of the United States?
				RIDAGEYR	Age in years at screening	Age in years of the participant at the time of screening. Individuals 80 and over are top coded at 80 years of age.
				DMDFMSIZ	Total number of people in the Family	Total number of people in the Family
				ACD011A	Speak English at home - Non-Hispanic white (NHW) or Non-Hispanic black(NHB)	What language(s) {do you} usually speak at home? THIS VARIABLE ONLY APPLY TO PARTICIPANTS SELF-IDENTIFIED AS "NON-HISPANIC WHITE", "NON-HISPANIC BLACK", OR "OTHER RACE - INCLUDING MULTI-RACIAL" (i.e., RIDRETH3=3, 4, OR 7).
				ACD011B	Speak Spanish at home - NHW or NHB	What language(s) {do you} usually speak at home? THIS VARIABLE ONLY APPLY TO PARTICIPANTS SELF-IDENTIFIED AS "NON-HISPANIC WHITE", "NON-HISPANIC BLACK", OR "OTHER RACE - INCLUDING MULTI-RACIAL" (i.e., RIDRETH3=3, 4, OR 7).
				ACD011C	Speak other language at home -NHW or NHB	What language(s) {do you} usually speak at home? THIS VARIABLE ONLY APPLY TO PARTICIPANTS SELF-IDENTIFIED AS "NON-HISPANIC WHITE", "NON-HISPANIC BLACK", OR "OTHER RACE - INCLUDING MULTI-RACIAL" (i.e., RIDRETH3=3, 4, OR 7).
				ACD040	Language(s) spoken at home – Hispanics	Now I'm going to ask you about language use. What language(s) {do you} usually speak at home? {Do you} speak only Spanish, more Spanish than English, both equally, more English than Spanish, or only English? THIS VARIABLE ONLY APPLY TO PARTICIPANTS SELF-IDENTIFIED AS "MEXICAN AMERICAN" OR "OTHER HISPANIC" (i.e., RIDRETH3=1, OR 2).
				ACD110	Language(s) spoken at home - Asians	{Do you} speak only (NON-ENGLISH LANGUAGE), more (NON-ENGLISH LANGUAGE) than English, both equally, more English than (NON-ENGLISH LANGUAGE), or only English? THIS VARIABLE ONLY APPLY TO PARTICIPANTS SELF-IDENTIFIED "NON-HISPANIC ASIAN" (i.e., RIDRETH3=6).
Emotion	A complex reaction pattern, involving experiential, behavioral, and physiological elements, by which the individual attempts to deal with a personally significant matter or event	Fear Anxiety Affect Stress Depression Positive / negative affect Burn-out	A subjective psychophysiological experience that might affect a person’s likelihood of making appropriate dietary and health choices, and engaging in sports and recreational activities	DPQ030	Trouble sleeping or sleeping too much	Over the last 2 weeks, how often have you been bothered by the following problems:] trouble falling or staying asleep, or sleeping too much?
				DPQ050	Poor appetite or overeating	[Over the last 2 weeks, how often have you been bothered by the following problems:] poor appetite or overeating?
				DPQ060	Feeling bad about yourself	[Over the last 2 weeks, how often have you been bothered by the following problems:] feeling bad about yourself - or that you are a failure or have let yourself or your family down?
				DPQ080	Moving or speaking slowly or too fast	Over the last 2 weeks, how often have you been bothered by the following problems:] moving or speaking so slowly that other people could have noticed? Or the opposite - being so fidgety or restless that you have been moving around a lot more than usual?
				DPQ100	Difficulty these problems have caused	How difficult have these problems made it for you to do your work, take care of things at home, or get along with people?
				HSQ480	no. of days mental health was not good	Now thinking about {your} mental health, which includes stress, depression, and problems with emotions, for how many days during the past 30 days was {your} mental health not good?
				HSQ496	How many days feel anxious	During the past 30 days, for about how many days {have you} felt worried, tense, or anxious?
Behavioral regulation	Anything aimed at managing or changing objectively observed or measured actions	Self-monitoring Breaking habit Action planning	All the things a person does concerning their diet, health and sports and recreational activities	PAQ655	Days vigorous recreational activities	In a typical week, on how many days {do you} do vigorous-intensity sports, fitness or recreational activities?
				PAD660	Minutes vigorous recreational activities	How much time {do you} spend doing vigorous-intensity sports, fitness or recreational activities on a typical day?
				PAQ670	Days moderate recreational activities	In a typical week, on how many days {do you} do moderate-intensity sports, fitness or recreational activities?
				PAD675	Minutes moderate recreational activities	How much time {do you} spend doing moderate-intensity sports, fitness or recreational activities on a typical day?
				DRQSDT1	Weight loss/Low calorie diet	Are you currently on any kind of diet, either to lose weight or for some other health-related reason? What kind of diet are you on? Is it a weight loss or low calorie diet: low fat or cholesterol diet; low salt or sodium diet; sugar free or low sugar diet; low fiber diet; high fiber diet; diabetic diet; or another type of diet?)
				DRQSDT2	Low fat/Low cholesterol diet	Are you currently on any kind of diet, either to lose weight or for some other health-related reason? What kind of diet are you on? Is it a weight loss or low calorie diet: low fat or cholesterol diet; low salt or sodium diet; sugar free or low sugar diet; low fiber diet; high fiber diet; diabetic diet; or another type of diet?)
				DRQSDT3	Low salt/Low sodium diet	Are you currently on any kind of diet, either to lose weight or for some other health-related reason? What kind of diet are you on? Is it a weight loss or low calorie diet: low fat or cholesterol diet; low salt or sodium diet; sugar free or low sugar diet; low fiber diet; high fiber diet; diabetic diet; or another type of diet?)
				DRQSDT4	Sugar free/Low sugar diet	Are you currently on any kind of diet, either to lose weight or for some other health-related reason? What kind of diet are you on? Is it a weight loss or low calorie diet: low fat or cholesterol diet; low salt or sodium diet; sugar free or low sugar diet; low fiber diet; high fiber diet; diabetic diet; or another type of diet?)
				DRQSDT5	Low fiber diet	Are you currently on any kind of diet, either to lose weight or for some other health-related reason? What kind of diet are you on? Is it a weight loss or low calorie diet: low fat or cholesterol diet; low salt or sodium diet; sugar free or low sugar diet; low fiber diet; high fiber diet; diabetic diet; or another type of diet?)
				DRQSDT6	High fiber diet	Are you currently on any kind of diet, either to lose weight or for some other health-related reason? What kind of diet are you on? Is it a weight loss or low calorie diet: low fat or cholesterol diet; low salt or sodium diet; sugar free or low sugar diet; low fiber diet; high fiber diet; diabetic diet; or another type of diet?)
				DRQSDT7	Diabetic diet	Are you currently on any kind of diet, either to lose weight or for some other health-related reason? What kind of diet are you on? Is it a weight loss or low calorie diet: low fat or cholesterol diet; low salt or sodium diet; sugar free or low sugar diet; low fiber diet; high fiber diet; diabetic diet; or another type of diet?)
				DRQSDT8	Weight gain/Muscle building diet	Are you currently on any kind of diet, either to lose weight or for some other health-related reason? What kind of diet are you on? Is it a weight loss or low calorie diet: low fat or cholesterol diet; low salt or sodium diet; sugar free or low sugar diet; low fiber diet; high fiber diet; diabetic diet; or another type of diet?)
				DRQSDT9	Low carbohydrate diet	Are you currently on any kind of diet, either to lose weight or for some other health-related reason? What kind of diet are you on? Is it a weight loss or low calorie diet: low fat or cholesterol diet; low salt or sodium diet; sugar free or low sugar diet; low fiber diet; high fiber diet; diabetic diet; or another type of diet?)
				DRQSDT10	High protein diet	Are you currently on any kind of diet, either to lose weight or for some other health-related reason? What kind of diet are you on? Is it a weight loss or low calorie diet: low fat or cholesterol diet; low salt or sodium diet; sugar free or low sugar diet; low fiber diet; high fiber diet; diabetic diet; or another type of diet?)
				DRQSDT91	Other special diet	Are you currently on any kind of diet, either to lose weight or for some other health-related reason? What kind of diet are you on? Is it a weight loss or low calorie diet: low fat or cholesterol diet; low salt or sodium diet; sugar free or low sugar diet; low fiber diet; high fiber diet; diabetic diet; or another type of diet?)
				DBD895	# of meals not home prepared	During the past 7 days, how many meals {did you} get that were prepared away from home in places such as restaurants, fast food places, food stands, grocery stores, or from vending machines?
				DBD900	# of meals from fast food or pizza place	How many of those meals {did you/} get from a fast-food or pizza place?
				DBD905	# of ready-to-eat foods in past 30 days	Some grocery stores sell “ready to eat” foods such as salads, soups, chicken, sandwiches and cooked vegetables in their salad bars and deli counters. During the past 30 days, how often did {you} eat “ready to eat” foods from the grocery store? Please do not include sliced meat or cheese you buy for sandwiches and frozen or canned foods.
				DBD910	# of frozen meals/pizza in past 30 days	During the past 30 days, how often did {you} eat frozen meals or frozen pizzas?
				MCQ370a	Are you now controlling or losing weight
						To lower {your} risk for certain diseases, {are you} now doing any of the following: controlling {your} weight or losing weight?
				MCQ370b	Are you now increasing exercise	To lower {your} risk for certain diseases, {are you} now doing any of the following: increasing {your} physical activity or exercise?
				MCQ370c	Are you now reducing salt in diet	To lower {your} risk for certain diseases, {are you} now doing any of the following: reducing the amount of sodium or salt in {your} diet?
				MCQ370d	Are you now reducing fat in diet	To lower {your} risk for certain diseases, {are you} now doing any of the following: reducing the amount of fat or calories in {your} diet?
				CBQ605	Looked up MyPyramid on internet	{Have you} looked up the My Pyramid plan for a {man/woman/person} {your} age on the internet?
				CBQ610	Tried MyPyramid plan	{Have you} tried to follow the {My Pyramid Plan/Pyramid plan} recommended for {you}?
				WHQ070	Tried to lose weight in past year	During the past 12 months, {have you} tried to lose weight? Tried to lose weight in past year.
				WHD080A	Ate less to lose weight	How did {you} try to lose weight? Ate less to lose weight.
				WHD080B	Switched to foods with lower calories	How did {you/SP} try to lose weight? Switched to foods with lower calories.
				WHD080C	Ate less fat to lose weight	How did {you/SP} try to lose weight? Ate less fat to lose weight.
				WHD080D	Exercised to lose weight	How did {you/SP} try to lose weight? Exercised to lose weight.
				WHD080E	Skipped meals	How did {you/SP} try to lose weight? Skipped meals.
				WHD080F	Ate diet foods or products	How did {you/SP} try to lose weight? Ate diet foods or products.
				WHD080G	Used a liquid diet formula	How did {you/SP} try to lose weight? Used a liquid diet formula.
				WHD080H	Joined a weight loss program	How did {you/SP} try to lose weight? Joined a weight loss program.
				WHD080I	Took prescription diet pills	How did {you/SP} try to lose weight? Took prescription diet pills.
				WHD080J	Took non-RX suppl. to lose weight	How did {you/SP} try to lose weight? Took non-RX suppl. to lose weight.
				WHD080K	Took laxatives or vomited	How did {you/SP} try to lose weight? Took laxatives or vomited.
				WHD080M	Drank a lot of water	How did {you/SP} try to lose weight? Drank a lot of water.
				WHD080N	Followed a special diet	How did {you/SP} try to lose weight? Followed a special diet.
				WHD080O	Ate fewer carbohydrates	How did {you/SP} try to lose weight? Ate fewer carbohydrates.
				WHD080P	Started to smoke or began to smoke again	How did {you/SP} try to lose weight? Started to smoke or began to smoke again.
				WHD080Q	Ate more fruits, vegetables, salads	How did {you/SP} try to lose weight? Ate more fruits, vegetables, salads.
				WHD080R	Changed eating habits	How did {you/SP} try to lose weight? Changed eating habits.
				WHD080S	Ate less sugar, candy, sweets	How did {you/SP} try to lose weight? Ate less sugar, candy, sweets.
				WHD080T	Ate less junk food or fast food	How did {you/SP} try to lose weight? Ate less junk food or fast food.
				WHD080L	Other	How did {you/SP} try to lose weight? Other.
				WHQ270	Seek help from a health professional	In the past 12 months, {did you} seek help from a personal trainer, dietitian, nutritionist, doctor or other health professional to lose weight?
				WHQ280A	Personal trainer	Was that a personal trainer?
				WHQ280B	Dietitian	Was that a dietitian?
				WHQ280C	Nutritionist	Was that a nutritionist?
				WHQ280D	Doctor	Was that a doctor?
				WHQ280E	Other health professional	Was that other health professional?
				WHQ060	Weight change intentional	Was the change between {your} current weight and {your} weight a year ago intentional?
				WHQ090	Tried not to gain weight in past year	During the past 12 months, {have you} done anything to keep from gaining weight?
				WHD100A	Ate less food	What did {you} do to keep from gaining weight? Ate less food
				WHD100B	Switched to foods with lower calories	What did {you} do to keep from gaining weight? Switched to foods with lower calories.
				WHD100C	Ate less fat	What did {you} do to keep from gaining weight? Ate less fat.
				WHD100D	Exercised	What did {you} do to keep from gaining weight? Exercised.
				WHD100E	Skipped meals	What did {you} do to keep from gaining weight? Skipped meals.
				WHD100F	Ate diet foods or products	What did {you} do to keep from gaining weight? Ate diet foods or products.
				WHD100G	Used liquid diet formula	What did {you} do to keep from gaining weight? Used liquid diet formula.
				WHD100H	Joined program to not gain weight	What did {you} do to keep from gaining weight? Joined program to not gain weight.
				WHD100I	Took prescription diet pills	What did {you} do to keep from gaining weight? Took prescription diet pills.
				WHD100J	Took non-prescription diet pills	What did {you} do to keep from gaining weight? Took non-prescription diet pills.
				WHD100K	Took laxatives or vomited	What did {you} do to keep from gaining weight? Took laxatives or vomited.
				WHD100M	Drank a lot of water	What did {you} do to keep from gaining weight? Drank a lot of water.
				WHD100N	Followed a special diet	What did {you} do to keep from gaining weight? Followed a special diet.
				WHD100O	Ate fewer carbohydrates	What did {you} do to keep from gaining weight? Ate fewer carbohydrates.
				WHD100P	Started to smoke or began to smoke again	What did {you} do to keep from gaining weight? Started to smoke or began to smoke again.
				WHD100Q	Ate more fruits, vegetables, salads	What did {you} do to keep from gaining weight? Ate more fruits, vegetables, salads.
				WHD100R	Changed eating habits	What did {you} do to keep from gaining weight? Changed eating habits.
				WHD100S	Ate less sugar, candy, sweets	What did {you} do to keep from gaining weight? Ate less sugar, candy, sweets.
				WHD100T	Ate less junk food or fast food	What did {you} do to keep from gaining weight? Ate less junk food or fast food.
				WHD100L	Other	What did {you} do to keep from gaining weight? Other.
				BPQ050A	Now taking prescribed medicine for HBP	{Are you} now taking a prescribed medicine?
				BPD058	How often checked BP at home last 12 mos	How often {did you check your} blood pressure at home during the last 12 months?
				BPQ100D	Now taking prescribed medicine	{Are you} now taking a prescribed medicine?
				DIQ050	Taking insulin now	{Are you} now taking insulin
				DIQ070	Take diabetic pills to lower blood sugar	{Are you} now taking diabetic pills to lower {your} blood sugar? These are sometimes called oral agents or oral hypoglycemic agents.
				Two 24-hours dietary recall	Total Nutrient Intakes files	Two 24-hour dietary recall interviews to estimate the total intake of food energy (calories), nutrients, and non-nutrient food components from foods and beverages; consumed during the 24-hour period prior to the interview. First dietary recall, in-person in the Mobile Examination Center (MEC) Second interview, by telephone 3 to 10 days later

## Sheet: Sheet2
Yes	Knowledge
No	Skills
	Social/professional role and identity
	Beliefs about capabilities
	Optimism
	Beliefs about consequences
	Reinforcement
	Intentions
	Goals
	Memory, attention and decision processes
	Environmental context and resources
	Social influences
	Emotion
	Behavioral regulation
